# Supplementary material for: Chemoinformatic Design and Profiling of Derivatives of Dasabuvir, Efavirenz, and Tipranavir as Potential Inhibitors of Zika Virus RNA-Dependent RNA Polymerase and Methyltransferase
Source: PubMed Central journal article supplement — ACS Omega. 2022 Sep 6;7(37):33330–48. doi: 10.1021/acsomega.2c03945 (PMC9494688; doi:10.1021/acsomega.2c03945), 2022-09-06
Supplement: ao2c03945_si_003.pdf [file ao2c03945_si_003.pdf]

Supporting information 3

**Chemoinformatic Design and Profiling of Derivatives of Dasabuvir, Efavirenz and Tipranavir as Potential Inhibitors of Zika virus RNA-dependent RNA polymerase and methyltransferase**

Madeleine I. Ezeh<sup>1</sup>, Onyinyechi E. Okonkwo<sup>1</sup>, Innocent N. Okpoli<sup>1,4</sup>, Chima E. Orji<sup>2</sup>, Benjamin U. Modozie<sup>1</sup>, Augustine C. Onyema<sup>3</sup> and Fortunatus C. Ezebuo<sup>1,4\*</sup>

<sup>1</sup>Department of Pharmaceutical and Medicinal Chemistry, Faculty of Pharmaceutical Sciences, Nnamdi Azikiwe University, PMB 5025 Awka 420110, Anambra State, Nigeria

<sup>2</sup>Department of Pharmacology and Toxicology, Faculty of Pharmaceutical Sciences, Nnamdi Azikiwe University, PMB 5025 Awka 420110, Anambra State, Nigeria

<sup>3</sup>Department of Biochemistry, Graduate Center, City University of New York (CUNY), New York, New York 10016, United States

<sup>4</sup>Drug Design and Informatics Group, Faculty of Pharmaceutical Sciences, Nnamdi Azikiwe University, PMB 5025 Awka 420110, Anambra State, Nigeria

\*Corresponding author: Fortunatus C. Ezebuo (fc.ezebuo@unizik.edu.ng)

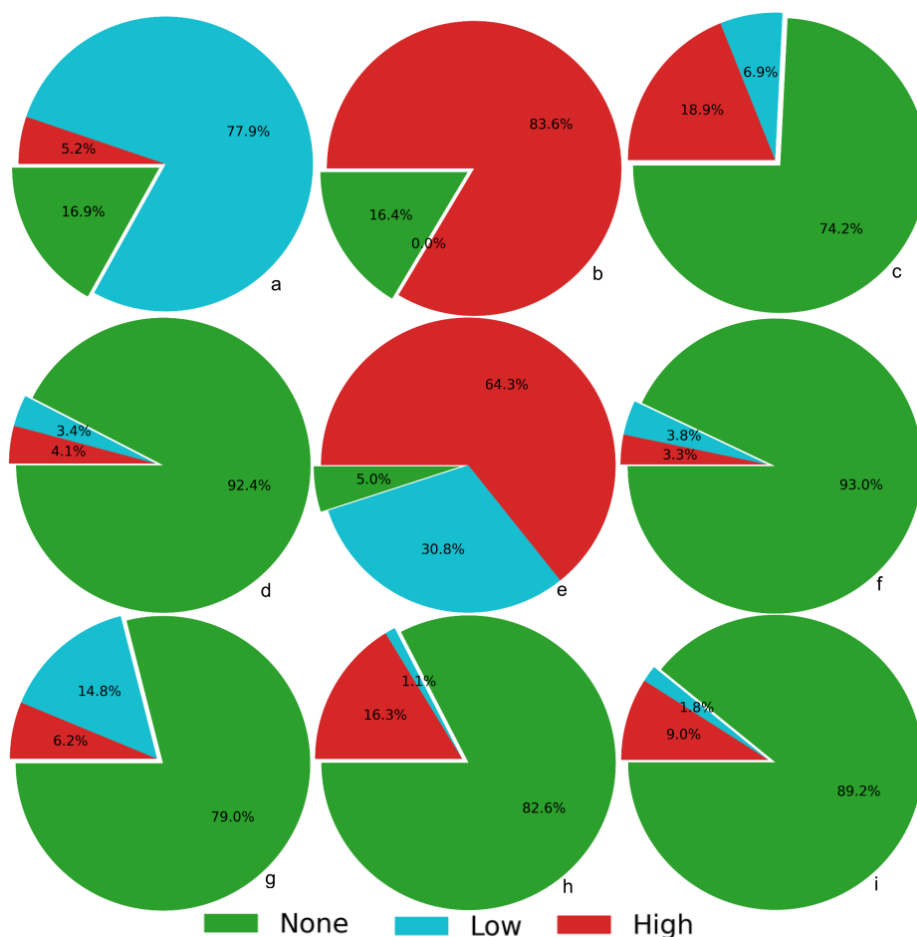

Figure S1: Toxicity prediction of designed compounds with DataWarrior: First panel (a – c) are plots of mutagenic, tumorigenic and irritation risks of derivatives of dasabuvir respectively. Second panel (d – f) are plots of mutagenic, tumorigenic and irritation risks of derivatives of efavirenz respectively. Again, third panel (g – i) are plots of mutagenic, tumorigenic and irritation risks of derivatives of tipranavir respectively.

Table S1: Binding energies of selected designed derivatives of dasabuvir for zika virus RNA-dependent RNA polymerase (RdRP) and methyltransferase (MTase)

| Code          | ID  | Smiles                                                                                  | Binding affinity for RdRP (kcal/mol) | Binding affinity for MTase (kcal/mol) |
|---------------|-----|-----------------------------------------------------------------------------------------|--------------------------------------|---------------------------------------|
| 980           | 1d  | <chem>CC(C)(C)c1cc(N(C=CC(N2)=O)C2=O)cc(-c(cc2cc3)ccc2nc3NS(N)(=O)=O)c1OC</chem>        | -7.55±0.10                           | -9.23±0.25                            |
| 1067          | 2d  | <chem>CC(C)(C)c1cc(N(C=CC(N2)=O)C2=O)cc(-c(cc2cc3)ccc2nc3NS(C)(=O)=O)c1OC</chem>        | -7.35±0.30                           | -9.45±0.30                            |
| 2043          | 3d  | <chem>CC(C)(C)c1cc(N(C=CC(N2)=O)C2=N)cc(-c(cc2cc3)ccc2nc3NS(C)(=O)=O)c1OC</chem>        | -7.58±0.55                           | -9.83±0.42                            |
| 3515          | 4d  | <chem>CC(C)(C)c1cc(N(C=CC(N2)=N)C2=O)cc(-c(cc2cc3)ccc2nc3NS(C)(=O)=O)c1OC</chem>        | -7.63±0.25                           | -9.68±0.05                            |
| 4794          | 5d  | <chem>CC(C)(C)c1cc(N(C=CC(N2)=O)C2=O)cc(-c(cc2cc3)ccc2nc3NS(O)(=O)=O)c1OC</chem>        | -7.65±0.10                           | -9.40±0.20                            |
| 5007          | 6d  | <chem>CC(C)(C)c1cc(N(C=CC(N2)=O)C2=O)cc(-c2cc3ccc(CN)cc3cc2)c1OC</chem>                 | -7.03±0.05                           | -9.30±0.00                            |
| 5553          | 7d  | <chem>CC(C)(c1cc(N(C=CC(N2)=O)C2=O)cc(-c(cc2cc3)ccc2nc3NS(C)(=O)=O)c1OC)O</chem>        | -7.38±0.15                           | -9.50±0.00                            |
| 5963          | 8d  | <chem>CC(C)(C)c1cc(N(C=CC(N2)=O)C2=O)cc(-c(cc2cc3)ccc2nc3NS(C)(=O)=O)c1NC</chem>        | -7.33±0.05                           | -9.25±0.19                            |
| 6061          | 9d  | <chem>CC(C)(C)c1cc(N(C=CC(N2)=O)C2=O)cc(-c(cc2cc3)ccc2nc3NS(C)(=O)=O)c1SC</chem>        | -7.60±0.00                           | -9.25±0.30                            |
| 6063          | 10d | <chem>CC(C)(C)c1cc(N(C=CC(N2)=O)C2=O)cc(-c(cc2cc3N)ccc2nc3NS(C)(=O)=O)c1OC</chem>       | -7.20±0.08                           | -9.33±0.05                            |
| 6253          | 11d | <chem>CC(C)(C)c1cc(N(C=CC(N2)=O)C2=O)cc(-c(cc2cc3)ec(N)e2nc3NS(C)(=O)=O)c1OC</chem>     | -7.50±0.00                           | -9.30±0.00                            |
| 6255          | 12d | <chem>CC(C)(C)c1cc(N(C=CC(N2)=O)C2=O)cc(-c(cc2cc(F)c3)ccc2nc3NS(C)(=O)=O)c1OC</chem>    | -7.40±0.00                           | -9.50±0.00                            |
| 6339          | 13d | <chem>CC(C)(C)c1cc(N(C=CC(N2)=O)C2=O)cc(-c2ccc(cc(CS(N)(=O)=O)c(C)c3)c3c2)c1OC</chem>   | -7.00±0.00                           | -9.40±0.08                            |
| 6416          | 14d | <chem>CC(C)(C)c1cc(N(C=CC(N2)=O)C2=O)cc(-c2ncc(cc(CS(N)(=O)=O)cc3)c3c2)c1OC</chem>      | -6.90±0.00                           | -9.23±0.10                            |
| Dasa<br>buvir | 15d | <chem>CC(C)(C)C1=CC(=CC(=C1OC)C2=CC3=C(C=C2)C=C(C=C3)NS(=O)(=O)C)N4C=CC(=O)NC4=O</chem> | -6.85±0.00                           | -9.23±0.25                            |
| 5095          | 16d | <chem>CC(C)(C)c1cc(N(C=CC(N2)=O)C2=O)cc(Cc(cc2cc3)ccc2nc3NS(C)(=O)=O)c1OC</chem>        | -9.20±0.00                           | Na                                    |
| 5005          | 17d | <chem>CC(C)(C)c1cc(N(C=CC(N2)=O)C2=O)cc(-c2ccc(ccc(CS(N)(=O)=O)c3)c3c2)c1OC</chem>      | -8.60±0.00                           | Na                                    |

Table S2: Binding energies of selected designed derivatives of tipranavir for zika virus RNA-dependent RNA polymerase (RdRP) and methyltransferase (MTase)

| Codes | ID  | Smiles                                                                                                | RdRP: 5U04 (kcal/mol) | Mtase: 5mrk (kcal/mol) |
|-------|-----|-------------------------------------------------------------------------------------------------------|-----------------------|------------------------|
| 1     | 1t  | <chem>CCC[C@@](CCc1cccc1)(CC(O)=C1[C@H](CC)c2cccc(NS(c3ncc(C(F)(F)F)cc3)(=O)=O)c2)OC1=O</chem>        | -7.5±0.54             | -9.7±0.00              |
| 76    | 2t  | <chem>CC[C@H](c1cccc(NS(c2ncc(C(F)(F)F)cc2)(=O)=O)c1)C(C(O)[C@@](CCC(C)C)(CCc1cccc1)C1)=O)=C1O</chem> | -7.55±0.64            | -9.75±0.10             |
| 457   | 3t  | <chem>CCC[C@@](CCc1cccc1)(CC(O)=C1[C@H](C)c2cccc(NS(c3ncc(C(F)(F)F)cc3)(=O)=O)c2)OC1=O</chem>         | -8.175±0.05           | -9.775±0.05            |
| 649   | 4t  | <chem>CCC[C@@](CCc1cccc1)(CC(O)=C1[C@H](CNC)c2cccc(NS(c3ncc(C(F)(F)F)cc3)(=O)=O)c2)OC1=O</chem>       | -7.85±0.06            | -9.7±0.00              |
| 718   | 5t  | <chem>CCC[C@@](CCc1cccc1)(CC(O)=C1[C@H](CN(C)C)c2cccc(NS(c3ncc(C(F)(F)F)cc3)(=O)=O)c2)OC1=O</chem>    | -7.625±0.56           | -9.8±0.00              |
| 1068  | 6t  | <chem>CCC[C@@](CCc1cccc1)(CC(O)=C1[C@H](CF)c2cccc(NS(c3ncc(C(F)(F)F)cc3)(=O)=O)c2)OC1=O</chem>        | -7.625±0.36           | -9.675±0.05            |
| 1368  | 7t  | <chem>CCC[C@@](CCc1cccc1)(CC(O)=C1[C@H](CCCN)c2cccc(NS(c3ncc(C(F)(F)F)cc3)(=O)=O)c2)OC1=O</chem>      | -7.65±0.06            | -9.6±0.00              |
| 2007  | 8t  | <chem>CC(C)C[C@@](CCc1cccc1)(CC(O)=C1[C@H](CS)c2cccc(NS(c3ncc(C(F)(F)F)cc3)(=O)=O)c2)OC1=O</chem>     | -7.5±0.54             | -9.75±0.006            |
| 2086  | 9t  | <chem>CC[C@H](c1cccc(NS(c2ncc(C(F)(F)F)cc2)(=O)=O)c1)C(C(O)[C@@](CCc1cccc1)(CC(C)=C)C1)=O)=C1O</chem> | -7.625±0.49           | -9.9±0.20              |
| 2517  | 10t | <chem>CC[C@H](c1cccc(NS(c2ncc(C(F)(F)F)cc2)(=O)=O)c1)C(C(O)[C@@](CCc1cccc1)(CCC#C)C1)=O)=C1O</chem>   | -7.6±0.47             | -9.6±0.00              |
| 2591  | 11t | <chem>CCC[C@@](CCc1cccc1)(CC(O)=C1[C@H](CC)c2cccc(NS(c3ncc(C(C)(F)F)cc3)(=O)=O)c2)OC1=O</chem>        | -7.9±0.14             | -9.625±0.05            |
| 2769  | 12t | <chem>CCC[C@@](CCc1cccc1)(CC(O)=C1[C@H](CC)c2cccc(NS(c3ncc(C(F)(F)F)nc3)(=O)=O)c2)OC1=O</chem>        | -7.925±0.11           | -9.6±0.00              |

|                   |     |                                                                                                        |             |             |
|-------------------|-----|--------------------------------------------------------------------------------------------------------|-------------|-------------|
| <b>2931</b>       | 13t | <chem>CC[C@H](c1cccc(NS(c2ncc(C(F)F)F)cc2)(=O)=O)c1)C(CO[C@@](CCc1cccc1)(CC#CC)C1)=O=C1O</chem>        | -7.8±0.80   | -9.85±0.10  |
| <b>3154</b>       | 14t | <chem>CCCC[C@@](CCc1cccc1)(CC(O)=C1[C@H](CC)c2cccc(NS(c3nnc(C(F)F)F)cc3)(=O)=O)c2)OC1=O</chem>         | -7.825±0.21 | -9.725±0.05 |
| <b>3217</b>       | 15t | <chem>CCC[C@@](CCc1cccc1)(CC(O)=C1[C@H](CC)c2cccc(NS(c3nnc(C(F)F)F)cc3)(=O)=O)c2)OC1=O</chem>          | -7.8±0.41   | -9.7±0.00   |
| <b>3377</b>       | 16t | <chem>CC[C@H](c1cccc(NS(c2ncc(C(F)F)F)cc2)(=O)=O)c1)C(CO[C@@](CCc1cccc1)(C/C=C/C)C1)=O=C1O</chem>      | -7.95±0.13  | -9.8±0.20   |
| <b>3683</b>       | 17t | <chem>CC[C@H](c1cccc(NS(c2ncc(C(F)F)F)cc2)(=O)=O)c1)C(CO[C@](CCC(C)=C)(CCc1cccc1)C1)=O=C1O</chem>      | -7.75±0.13  | -9.7±0.00   |
| <b>3828</b>       | 18t | <chem>CC[C@@H](C)C[C@@](CCc1cccc1)(CC(O)=C1[C@H](CC)c2cccc(NS(c3ncc(C(F)F)F)cc3)(=O)=O)c2)OC1=O</chem> | -7.5±0.61   | -9.65±0.06  |
| <b>5262</b>       | 19t | <chem>CCC[C@@](CCc1cccc1)(CC(O)=C1[C@H](CF)c2cc(NS(c3ncc(C(F)F)F)cc3)(=O)=O)cnc2)OC1=O</chem>          | -7.625±0.63 | -9.6±0.00   |
| <b>5634</b>       | 20t | <chem>CCC[C@@](CCc1cccc1)(CC(O)=C1[C@H](CCCO)c2cccc(NS(c3ncc(C(F)F)F)cc3)(=O)=O)c2)OC1=O</chem>        | -7.625±0.11 | -9.7±0.00   |
| <b>Tipranavir</b> | 21t | <chem>CCCC1(CC(=C(C(=O)O)1)C(CC)C2=CC(=CC=C2)NS(=O)(=O)C3=NC=C(C=C3)C(F)F)O)CCC4=CC=CC=C4</chem>       | -7.5±0.34   | -9.6±0.00   |
| <b>1510</b>       | 22t | <chem>CCC[C@@](CCc1cccc1)(CC(O)=C1[C@H](CC)c2cccc(NS(c3ncc(C(F)F)F)cc3)(=O)=O)n2)OC1=O</chem>          | Na          | -10.25±0.06 |
| <b>6675</b>       | 23t | <chem>CCC[C@@](CCc1cccc1)(CC(O)=C1[C@H](CF)c2cccc(NS(c3ncc(C(F)F)F)cc3)(=O)=O)n2)OC1=O</chem>          | Na          | -10.2±0.00  |
| <b>5719</b>       | 24t | <chem>CCC[C@@](CCc1cccc1)(CC(O)=C1[C@H](CCC(O)=O)c2cccc(NS(c3ncc(C(F)F)F)cc3)(=O)=O)c2)OC1=O</chem>    | Na          | -10.08±0.05 |
| <b>2541</b>       | 25t | <chem>CC[C@H](c1cccc(NS(c2ncc(C(F)F)F)cc2)(=O)=O)c1)C(CO[C@@](CCc1cccc1)(CC#C)C1)=O=C1O</chem>         | Na          | -10.08±0.05 |
| <b>170</b>        | 26t | <chem>CC[C@H](c1cccc(NS(c2ncc(C(F)F)F)cc2)(=O)=O)c1)C(CO[C@@](CCc1cccc1)(CC(C)C)C1)=O=C1O</chem>       | Na          | -10±0.00    |
| <b>1186</b>       |     | <chem>CCC[C@@](CCc1cccc1)(CC(O)=C1[C@H](CC)c2cccc(NS(c3ncc(C(F)F)F)cc3)(=O)=O)c2)OC1=O</chem>          | Na          | -9.9±0.00   |
| <b>1493</b>       |     | <chem>CCC[C@@](CCc1cccc1)(CC(O)=C1[C@H](CCC#N)c2cccc(NS(c3ncc(C(F)F)F)cc3)(=O)=O)c2)OC1=O</chem>       | Na          | -9.9±0.00   |
| <b>4435</b>       |     | <chem>CC[C@H](c1ccc(NS(c2ncc(C(F)F)F)cc2)(=O)=O)cnc1)C(CO[C@@](CCc1cccc1)(CCF)C1)=O=C1O</chem>         | -7.925±0.05 | Na          |
| <b>264</b>        |     | <chem>CCC[C@@](CCc1cccc1)(CC(O)=C1[C@H](CCO)c2cccc(NS(c3ncc(C(F)F)F)cc3)(=O)=O)c2)OC1=O</chem>         | -7.9±0.08   | Na          |

Table S3: Binding energies of selected designed derivatives of tipranavir for zika virus RNA-dependent RNA polymerase (RdRP)

| Code             | ID | Smiles                                                      | RdRP: 5U04 (kcal/mol) |
|------------------|----|-------------------------------------------------------------|-----------------------|
| <b>1501</b>      | 1e | <chem>FC([C@](CC#CC1CC1)(c(cc(cc1)Cl)c1N1)OC1=S)(F)F</chem> | -6.675±0.05           |
| <b>1436</b>      | 2e | <chem>O=C1O[C@](CC#CC2CC2)(C(F)F)F)c2cc(Cl)ncc2N1</chem>    | -6.65±0.06            |
| <b>Efavirenz</b> | 3e | <chem>C1CC1C#CC2(C3=C(C=CC(=C3)Cl)NC(=O)O2)C(F)F</chem>     | -6.6±0.00             |

Table S4: Binding energies of selected designed derivatives of tipranavir for zika virus methyltransferase (MTase)

| Code             | ID | Smiles                                                     | Mtase: 5mrk (kcal/mol) |
|------------------|----|------------------------------------------------------------|------------------------|
| <b>4403</b>      | 4e | <chem>FC([C@@](c1c(N2)nnc(F)c1)(C#CC1CC1)OC2=S)(F)F</chem> | -7.6±0.00              |
| <b>4327</b>      | 5e | <chem>FC([C@@](c1cc(Cl)nnc1N1)(C#CC2CC2)OC1=S)(F)F</chem>  | -7.5±0.00              |
| <b>Efavirenz</b> | 3e | <chem>C1CC1C#CC2(C3=C(C=CC(=C3)Cl)NC(=O)O2)C(F)F</chem>    | -7.425±0.00            |

Table S5: Bio-activities of selected designed derivatives of dasabuvir for zika virus RNA-dependent RNA polymerase (RdRP) and methyltransferase (MTase)

| Code        | ID | MTase                |          |          |          |          | RdRP                 |          |          |          |          |
|-------------|----|----------------------|----------|----------|----------|----------|----------------------|----------|----------|----------|----------|
|             |    | Average Ki (uM)      | LE       | Lescale  | LELP     | FQ       | Average Ki (uM)      | LE       | Lescale  | LELP     | FQ       |
| <b>980</b>  | 1d | 0.180067848±0.059893 | 0.263571 | 0.287404 | 11.37149 | 0.917078 | 2.911069187±0.449621 | 0.215714 | 0.287404 | 13.8943  | 0.750562 |
| <b>1067</b> | 2d | 0.127327876±0.058735 | 0.270000 | 0.287404 | 13.31148 | 0.939445 | 4.376737877±1.658545 | 0.210000 | 0.287404 | 17.11476 | 0.73068  |
| <b>2043</b> | 3d | 0.076982246±0.067006 | 0.280714 | 0.287404 | 11.38204 | 0.976725 | 3.703437534±2.842897 | 0.216429 | 0.287404 | 14.76284 | 0.753047 |
| <b>3515</b> | 4d | 0.07970735±0.0070140 | 0.276429 | 0.287404 | 11.5585  | 0.961813 | 2.719231219±1.199306 | 0.217857 | 0.287404 | 14.66603 | 0.758018 |

|                                |     |                      |          |          |          |          |                      |          |          |          |          |
|--------------------------------|-----|----------------------|----------|----------|----------|----------|----------------------|----------|----------|----------|----------|
| <b>4794</b>                    | 5d  | 0.132631428±0.051589 | 0.268571 | 0.287404 | 7.46133  | 0.934475 | 2.461448198±0.449621 | 0.218571 | 0.287404 | 9.16817  | 0.760503 |
| <b>5007</b>                    | 6d  | 0.149790974±0.000000 | 0.290625 | 0.315910 | 14.02942 | 0.919960 | 7.015404169±0.567373 | 0.219531 | 0.31591  | 18.57275 | 0.694916 |
| <b>5553</b>                    | 7d  | 0.106837052±0.000000 | 0.271429 | 0.287404 | 8.429842 | 0.944416 | 3.959587719±0.87415  | 0.210714 | 0.287404 | 10.85878 | 0.733165 |
| <b>5963</b>                    | 8d  | 0.169164284±0.050324 | 0.264286 | 0.287404 | 12.52849 | 0.919563 | 4.225781837±0.341762 | 0.209286 | 0.287404 | 15.82096 | 0.728194 |
| <b>6061</b>                    | 9d  | 0.176561056±0.066907 | 0.264286 | 0.287404 | 15.66978 | 0.919563 | 2.648363028±0.000000 | 0.217143 | 0.287404 | 19.07178 | 0.755533 |
| <b>6063</b>                    | 10d | 0.143969195±0.011644 | 0.259028 | 0.278385 | 11.26057 | 0.930466 | 5.243256843±0.722934 | 0.200000 | 0.278385 | 14.58400 | 0.71843  |
| <b>6253</b>                    | 11d | 0.149790974±0.000000 | 0.258333 | 0.278385 | 11.29084 | 0.927972 | 3.135879681±0.000000 | 0.208333 | 0.278385 | 14.00064 | 0.748364 |
| <b>6255</b>                    | 12d | 0.106837052±0.000000 | 0.263889 | 0.278385 | 14.00173 | 0.947928 | 3.713139502±0.000000 | 0.205556 | 0.278385 | 17.97519 | 0.738386 |
| <b>6339</b>                    | 13d | 0.127408935±0.017567 | 0.261111 | 0.278385 | 16.90506 | 0.937950 | 7.299090779±0.000000 | 0.194444 | 0.278385 | 22.70109 | 0.698473 |
| <b>6416</b>                    | 14d | 0.171740335±0.028636 | 0.263571 | 0.287404 | 11.9903  | 0.917078 | 8.642723911±0.000000 | 0.197143 | 0.287404 | 16.03051 | 0.685944 |
| <b>Dasa<br/>buvir<br/>5095</b> | 15d | 0.180067848±0.059893 | 0.263571 | 0.287404 | 15.63561 | 0.917078 | 9.795009846±3.335809 | 0.195714 | 0.287404 | 21.05672 | 0.680974 |
| <b>5005</b>                    | 16d | Na                   | Na       | Na       | Na       | Na       | 0.177364835±0.0000   | 0.255556 | 0.278385 | 14.67704 | 0.917994 |
| <b>5005</b>                    | 17d | Na                   | Na       | Na       | Na       | Na       | 0.488831033±0.0000   | 0.245714 | 0.287404 | 16.56477 | 0.854945 |
| <b>6423</b>                    |     | 0.106837052±0.000    | 0.271429 | 0.287404 | 10.59616 | 0.944416 | Na                   | Na       | Na       | Na       | Na       |
| <b>5956</b>                    |     | 0.149790974±0.000    | 0.265714 | 0.287404 | 10.10183 | 0.924533 | Na                   | Na       | Na       | Na       | Na       |

Table S6: Bio-activities of selected designed derivatives of tipranavir for zika virus RNA-dependent RNA polymerase (RdRP) and methyltransferase (MTase)

| Code                   | ID  | MTase                |          |          |          |          | RdRP                 |          |          |          |          |
|------------------------|-----|----------------------|----------|----------|----------|----------|----------------------|----------|----------|----------|----------|
|                        |     | Average Ki (uM)      | LE       | Lescale  | LELP     | FQ       | Average Ki (uM)      | LE       | Lescale  | LELP     | FQ       |
| <b>1</b>               | 1t  | 0.076200557±0.00000  | 0.230952 | 0.228931 | 25.90274 | 1.008832 | 4.197812828±2.986329 | 0.178571 | 0.228931 | 33.50088 | 0.780024 |
| <b>76</b>              | 2t  | 0.070737757±0.010926 | 0.221591 | 0.214087 | 30.03282 | 1.035049 | 4.856901424±5.481093 | 0.171591 | 0.214087 | 38.78411 | 0.801499 |
| <b>457</b>             | 3t  | 0.06731572±0.005923  | 0.238415 | 0.236647 | 23.18608 | 1.007471 | 1.005139848±0.076595 | 0.19939  | 0.236647 | 27.72402 | 0.842565 |
| <b>649</b>             | 4t  | 0.076200557±0.00000  | 0.225581 | 0.221413 | 20.19182 | 1.018829 | 1.742091203±0.14683  | 0.182558 | 0.221413 | 24.95041 | 0.824516 |
| <b>718</b>             | 5t  | 0.064354107±0.00000  | 0.222727 | 0.214087 | 21.6471  | 1.040357 | 3.766283534±3.738882 | 0.173295 | 0.214087 | 27.82185 | 0.809461 |
| <b>1068</b>            | 6t  | 0.07970735±0.007014  | 0.230357 | 0.228931 | 23.01774 | 1.006232 | 2.971291112±1.857437 | 0.181548 | 0.228931 | 29.20611 | 0.793025 |
| <b>1368</b>            | 7t  | 0.090227728±0.00000  | 0.218182 | 0.214087 | 23.43092 | 1.019125 | 2.442500365±0.205863 | 0.173864 | 0.214087 | 29.4035  | 0.812115 |
| <b>2007</b>            | 8t  | 0.070277332±0.00684  | 0.226744 | 0.221413 | 25.04585 | 1.024080 | 4.533004358±4.381233 | 0.174419 | 0.221413 | 32.5596  | 0.787754 |
| <b>2086</b>            | 9t  | 0.056981919±0.022164 | 0.230233 | 0.221413 | 27.81188 | 1.039835 | 3.22427047±1.983123  | 0.177326 | 0.221413 | 36.10985 | 0.800883 |
| <b>2517</b>            | 10t | 0.090227728±0.00000  | 0.223256 | 0.221413 | 25.09767 | 1.008325 | 3.503956799±2.96929  | 0.176744 | 0.221413 | 31.70232 | 0.798257 |
| <b>2591</b>            | 11t | 0.086720935±0.007014 | 0.229167 | 0.228931 | 26.36684 | 1.001031 | 1.631602639±0.363694 | 0.188095 | 0.228931 | 32.12415 | 0.821626 |
| <b>2769</b>            | 12t | 0.090227728±0.00000  | 0.228571 | 0.228931 | 22.02988 | 0.998431 | 1.544673432±0.223054 | 0.18869  | 0.228931 | 26.68603 | 0.824226 |
| <b>2931</b>            | 13t | 0.059812156±0.010926 | 0.22907  | 0.221413 | 26.49368 | 1.034584 | 4.307728838±5.796847 | 0.181395 | 0.221413 | 33.45676 | 0.819264 |
| <b>3154</b>            | 14t | 0.073238945±0.005923 | 0.226163 | 0.221413 | 25.03418 | 1.021454 | 1.891002645±0.534067 | 0.181977 | 0.221413 | 31.11277 | 0.82189  |
| <b>3217</b>            | 15t | 0.076200557±0.00000  | 0.230952 | 0.228931 | 22.54751 | 1.008832 | 2.321583299±1.673179 | 0.185714 | 0.228931 | 28.03985 | 0.811225 |
| <b>3377</b>            | 16t | 0.067471279±0.026244 | 0.227907 | 0.221413 | 27.13607 | 1.029332 | 1.492310966±0.280452 | 0.184884 | 0.221413 | 33.45075 | 0.835019 |
| <b>3683</b>            | 17t | 0.076200557±0.000000 | 0.220455 | 0.214087 | 31.10664 | 1.029741 | 2.092295784±0.393208 | 0.176136 | 0.214087 | 38.93347 | 0.822731 |
| <b>3828</b>            | 18t | 0.083214142±0.008099 | 0.219318 | 0.214087 | 30.34404 | 1.024433 | 5.017245467±5.391989 | 0.170455 | 0.214087 | 39.04267 | 0.796191 |
| <b>5262</b>            | 19t | 0.090227728±0.000000 | 0.228571 | 0.228931 | 18.81863 | 0.998431 | 4.175242544±4.590815 | 0.181548 | 0.228931 | 23.69296 | 0.793025 |
| <b>5634</b>            | 20t | 0.076200557±0.000000 | 0.220455 | 0.214087 | 24.99381 | 1.029741 | 2.564379529±0.370302 | 0.173295 | 0.214087 | 31.79541 | 0.809461 |
| <b>Tipra<br/>navir</b> | 21t | 0.090227728±0.000000 | 0.228571 | 0.228931 | 32.04906 | 0.998431 | 3.605182303±2.139293 | 0.178571 | 0.228931 | 41.0228  | 0.780024 |

|             |     |                      |          |          |          |          |                      |          |          |          |          |
|-------------|-----|----------------------|----------|----------|----------|----------|----------------------|----------|----------|----------|----------|
| <b>1510</b> | 22t | 0.030192974±0.002938 | 0.244048 | 0.228931 | 22.07274 | 1.066033 | NA                   | NA       | NA       | NA       | NA       |
| <b>6675</b> | 23t | 0.032737746±0.000000 | 0.242857 | 0.228931 | 19.38094 | 1.060833 | NA                   | NA       | NA       | NA       | NA       |
| <b>5719</b> | 24t | 0.040548134±0.003568 | 0.223889 | 0.20695  | 23.04893 | 1.081848 | NA                   | NA       | NA       | NA       | NA       |
| <b>2541</b> | 25t | 0.040548134±0.003568 | 0.239881 | 0.228931 | 21.46398 | 1.047833 | NA                   | NA       | NA       | NA       | NA       |
| <b>170</b>  | 26t | 0.045899983±0.000000 | 0.232558 | 0.221413 | 26.66258 | 1.050339 | NA                   | NA       | NA       | NA       | NA       |
| <b>1186</b> |     | 0.054349355±0.000000 | 0.230233 | 0.221413 | 26.42155 | 1.039835 | NA                   | NA       | NA       | NA       | NA       |
| <b>1493</b> |     | 0.054349355±0.000000 | 0.225000 | 0.214087 | 25.25467 | 1.050972 | NA                   | NA       | NA       | NA       | NA       |
| <b>4435</b> |     | NA                   | NA       | NA       | NA       | NA       | 1.533260062±0.124003 | 0.18869  | 0.228931 | 22.79606 | 0.824226 |
| <b>264</b>  |     | NA                   | NA       | NA       | NA       | NA       | 1.606674899±0.221526 | 0.183721 | 0.221413 | 27.51782 | 0.829768 |

Table S7: Name and structures of selected designed derivatives of dasabuvir as potential inhibitors of zika virus RNA-dependent RNA polymerase (RdRP) and/or methyltransferase (MTase)

| Code | ID | Structure                                                                           | Name                                                                                                                  |
|------|----|-------------------------------------------------------------------------------------|-----------------------------------------------------------------------------------------------------------------------|
| 980  | 1d | 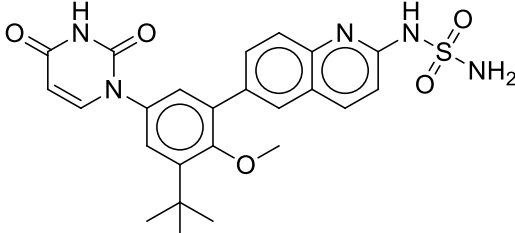   | N-{6-[3-tert-butyl-5-(2,4-dioxo-1,2,3,4-tetrahydropyrimidin-1-yl)-2-methoxyphenyl]quinolin-2-yl}aminosulfonamide      |
| 1067 | 2d |  | N-(6-(3-(tert-butyl)-5-(2,4-dioxo-3,4-dihydropyrimidin-1(2H)-yl)-2-methoxyphenyl)quinolin-2-yl)methanesulfonamide     |
| 2043 | 3d |  | N-(6-(3-(tert-butyl)-5-(2-imino-4-oxo-3,4-dihydropyrimidin-1(2H)-yl)-2-methoxyphenyl)quinolin-2-yl)methanesulfonamide |
| 3515 | 4d |  | N-(6-(3-(tert-butyl)-5-(4-imino-2-oxo-3,4-dihydropyrimidin-1(2H)-yl)-2-methoxyphenyl)quinolin-2-yl)methanesulfonamide |

|      |     |  |                                                                                                                             |
|------|-----|--|-----------------------------------------------------------------------------------------------------------------------------|
| 4794 | 5d  |  | (6-(3-(tert-butyl)-5-(2,4-dioxo-3,4-dihydropyrimidin-1(2H)-yl)-2-methoxyphenyl)quinolin-2-yl)sulfamic acid                  |
| 5007 | 6d  |  | 1-(3-(6-(aminomethyl)naphthalen-2-yl)-5-(tert-butyl)-4-methoxyphenyl)pyrimidine-2,4(1H,3H)-dione                            |
| 5553 | 7d  |  | N-(6-(5-(2,4-dioxo-3,4-dihydropyrimidin-1(2H)-yl)-3-(2-hydroxypropan-2-yl)-2-methoxyphenyl)quinolin-2-yl)methanesulfonamide |
| 5963 | 8d  |  | N-(6-(3-(tert-butyl)-5-(2,4-dioxo-3,4-dihydropyrimidin-1(2H)-yl)-2-(methylamino)phenyl)quinolin-2-yl)methanesulfonamide     |
| 6061 | 9d  |  | N-(6-(3-(tert-butyl)-5-(2,4-dioxo-3,4-dihydropyrimidin-1(2H)-yl)-2-(methylthio)phenyl)quinolin-2-yl)methanesulfonamide      |
| 6063 | 10d |  | N-(3-amino-6-(3-(tert-butyl)-5-(2,4-dioxo-3,4-dihydropyrimidin-1(2H)-yl)-2-methoxyphenyl)quinolin-2-yl)methanesulfonamide   |

|            |     |  |                                                                                                                            |
|------------|-----|--|----------------------------------------------------------------------------------------------------------------------------|
| 6253       | 11d |  | N-(8-amino-6-(3-(tert-butyl)-5-(2,4-dioxo-3,4-dihydropyrimidin-1(2H)-yl)-2-methoxyphenyl)quinolin-2-yl)methanesulfonamide  |
| 6255       | 12d |  | N-(6-(3-(tert-butyl)-5-(2,4-dioxo-3,4-dihydropyrimidin-1(2H)-yl)-2-methoxyphenyl)-4-fluoroquinolin-2-yl)methanesulfonamide |
| 6339       | 13d |  | (6-(3-(tert-butyl)-5-(2,4-dioxo-3,4-dihydropyrimidin-1(2H)-yl)-2-methoxyphenyl)-3-methylnaphthalen-2-yl)methanesulfonamide |
| 6416       | 14d |  | (3-(3-(tert-butyl)-5-(2,4-dioxo-3,4-dihydropyrimidin-1(2H)-yl)-2-methoxyphenyl)isoquinolin-7-yl)methanesulfonamide         |
| Dasa buvir | 15d |  | N-(6-(3-(tert-butyl)-5-(2,4-dioxo-3,4-dihydropyrimidin-1(2H)-yl)-2-methoxyphenyl)naphthalen-2-yl)methanesulfonamide        |
| 5095       | 16d |  | N-(6-(3-(tert-butyl)-5-(2,4-dioxo-3,4-dihydropyrimidin-1(2H)-yl)-2-methoxybenzyl)quinolin-2-yl)methanesulfonamide          |

|      |     |  |                                                                                                                          |
|------|-----|--|--------------------------------------------------------------------------------------------------------------------------|
| 5005 | 17d |  | (7-(3-(tert-butyl)-5-(2,4-dioxo-3,4-dihydropyrimidin-1(2H)-yl)-2-methoxyphenyl)naphthalen-2-yl)methanesulfonamide        |
| 2089 | 18d |  | (7-(3-(tert-butyl)-5-(2,4-dioxo-3,4-dihydropyrimidin-1(2H)-yl)-2-methoxyphenyl)isoquinolin-3-yl)sulfamic acid            |
| 3758 | 19d |  | 3-(6-(3-(tert-butyl)-5-(2,4-dioxo-3,4-dihydropyrimidin-1(2H)-yl)-2-methoxyphenyl)naphthalen-2-yl)propane-1-sulfonic acid |
| 3643 | 20d |  | (6-(3-(tert-butyl)-5-(2,4-dioxo-3,4-dihydropyrimidin-1(2H)-yl)-2-methoxyphenyl)naphthalen-2-yl)methanesulfonic acid      |
| 3741 | 21d |  | (6-(3-(tert-butyl)-5-(2,4-dioxo-3,4-dihydropyrimidin-1(2H)-yl)-2-ethoxyphenyl)naphthalen-2-yl)methanesulfonic acid       |
| 3742 | 22d |  | 2-(6-(3-(tert-butyl)-5-(2,4-dioxo-3,4-dihydropyrimidin-1(2H)-yl)-2-methoxyphenyl)naphthalen-2-yl)ethanesulfonic acid     |



|      |  |                                                                                   |                                                                                                                            |
|------|--|-----------------------------------------------------------------------------------|----------------------------------------------------------------------------------------------------------------------------|
| 6423 |  | 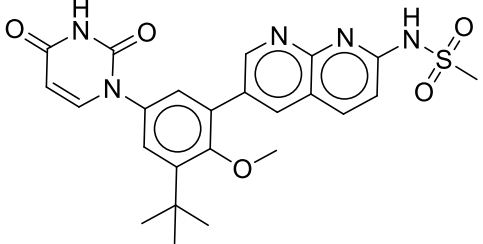 | N-(6-(3-(tert-butyl)-5-(2,4-dioxo-3,4-dihydropyrimidin-1(2H)-yl)-2-methoxyphenyl)-1,8-naphthyridin-2-yl)methanesulfonamide |
| 5956 |  |  | N-(6-(3-(tert-butyl)-5-(2,4-dioxo-3,4-dihydropyrimidin-1(2H)-yl)-2-methoxyphenyl)-1,7-naphthyridin-2-yl)methanesulfonamide |

Table S8: Name and structures of selected designed derivatives of tipranavir as potential inhibitors of zika virus RNA-dependent RNA polymerase (RdRP) and/or methyltransferase (MTase)

| Codes | ID | Smiles                                                                              | Name                                                                                                                                        |
|-------|----|-------------------------------------------------------------------------------------|---------------------------------------------------------------------------------------------------------------------------------------------|
| 1     | 1t | 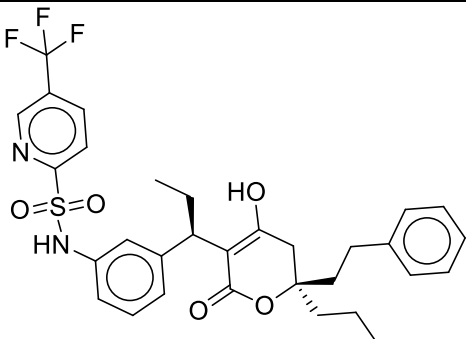  | N-(3-((R)-1-((R)-4-hydroxy-2-oxo-6-phenethyl-6-propyl-5,6-dihydro-2H-pyran-3-yl)propyl)phenyl)-5-(trifluoromethyl)pyridine-2-sulfonamide    |
| 76    | 2t |  | N-(3-((R)-1-((R)-4-hydroxy-6-isopentyl-2-oxo-6-phenethyl-5,6-dihydro-2H-pyran-3-yl)propyl)phenyl)-5-(trifluoromethyl)pyridine-2-sulfonamide |
| 457   | 3t |  | N-(3-((R)-1-((R)-4-hydroxy-2-oxo-6-phenethyl-6-propyl-5,6-dihydro-2H-pyran-3-yl)ethyl)phenyl)-5-(trifluoromethyl)pyridine-2-sulfonamide     |

|      |    |                                                                                     |                                                                                                                                                           |
|------|----|-------------------------------------------------------------------------------------|-----------------------------------------------------------------------------------------------------------------------------------------------------------|
| 649  | 4t | 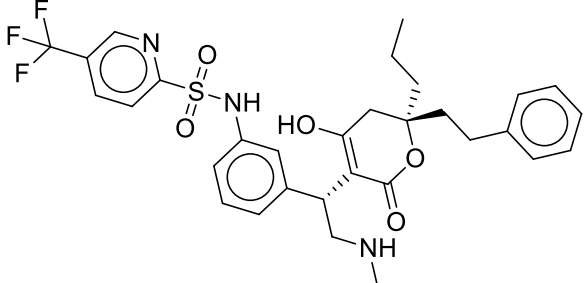   | N-(3-((R)-1-((R)-4-hydroxy-2-oxo-6-phenethyl-6-propyl-5,6-dihydro-2H-pyran-3-yl)-2-(methylamino)ethyl)phenyl)-5-(trifluoromethyl)pyridine-2-sulfonamide   |
| 718  | 5t |    | N-(3-((R)-2-(dimethylamino)-1-((R)-4-hydroxy-2-oxo-6-phenethyl-6-propyl-5,6-dihydro-2H-pyran-3-yl)ethyl)phenyl)-5-(trifluoromethyl)pyridine-2-sulfonamide |
| 1068 | 6t |   | N-(3-((R)-2-fluoro-1-((R)-4-hydroxy-2-oxo-6-phenethyl-6-propyl-5,6-dihydro-2H-pyran-3-yl)ethyl)phenyl)-5-(trifluoromethyl)pyridine-2-sulfonamide          |
| 1368 | 7t |  | N-(3-((R)-4-amino-1-((R)-4-hydroxy-2-oxo-6-phenethyl-6-propyl-5,6-dihydro-2H-pyran-3-yl)butyl)phenyl)-5-(trifluoromethyl)pyridine-2-sulfonamide           |
| 2007 | 8t |  | N-(3-((R)-1-((S)-4-hydroxy-6-isobutyl-2-oxo-6-phenethyl-5,6-dihydro-2H-pyran-3-yl)-2-mercaptoethyl)phenyl)-5-(trifluoromethyl)pyridine-2-sulfonamide      |

|      |     |  |                                                                                                                                                   |
|------|-----|--|---------------------------------------------------------------------------------------------------------------------------------------------------|
| 2086 | 9t  |  | N-(3-((R)-1-((S)-4-hydroxy-6-(2-methylallyl)-2-oxo-6-phenethyl-5,6-dihydro-2H-pyran-3-yl)propyl)phenyl)-5-(trifluoromethyl)pyridine-2-sulfonamide |
| 2517 | 10t |  | N-(3-((R)-1-((R)-6-(but-3-yn-1-yl)-4-hydroxy-2-oxo-6-phenethyl-5,6-dihydro-2H-pyran-3-yl)propyl)phenyl)-5-(trifluoromethyl)pyridine-2-sulfonamide |
| 2591 | 11t |  | 5-(1,1-difluoroethyl)-N-(3-((R)-1-((R)-4-hydroxy-2-oxo-6-phenethyl-6-propyl-5,6-dihydro-2H-pyran-3-yl)propyl)phenyl)pyridine-2-sulfonamide        |
| 2769 | 12t |  | N-(3-((R)-1-((R)-4-hydroxy-2-oxo-6-phenethyl-6-propyl-5,6-dihydro-2H-pyran-3-yl)propyl)phenyl)-5-(trifluoromethyl)pyridine-2-sulfonamide          |
| 2931 | 13t |  | N-(3-((R)-1-((S)-6-(but-2-yn-1-yl)-4-hydroxy-2-oxo-6-phenethyl-5,6-dihydro-2H-pyran-3-yl)propyl)phenyl)-5-(trifluoromethyl)pyridine-2-sulfonamide |
| 3154 | 14t |  | N-(3-((S)-1-((S)-6-butyl-4-hydroxy-2-oxo-6-phenethyl-5,6-dihydro-2H-pyran-3-yl)propyl)phenyl)-6-(trifluoromethyl)pyridazine-3-sulfonamide         |

|      |     |  |                                                                                                                                                           |
|------|-----|--|-----------------------------------------------------------------------------------------------------------------------------------------------------------|
| 3217 | 15t |  | N-(3-((R)-1-((R)-4-hydroxy-2-oxo-6-phenethyl-6-propyl-5,6-dihydro-2H-pyran-3-yl)propyl)phenyl)-6-(trifluoromethyl)pyridazine-3-sulfonamide                |
| 3377 | 16t |  | N-(3-((R)-1-((S)-6-((E)-but-2-en-1-yl)-4-hydroxy-2-oxo-6-phenethyl-5,6-dihydro-2H-pyran-3-yl)propyl)phenyl)-5-(trifluoromethyl)pyridine-2-sulfonamide     |
| 3683 | 17t |  | N-(3-((R)-1-((R)-4-hydroxy-6-(3-methylbut-3-en-1-yl)-2-oxo-6-phenethyl-5,6-dihydro-2H-pyran-3-yl)propyl)phenyl)-5-(trifluoromethyl)pyridine-2-sulfonamide |
| 3828 | 18t |  | N-(3-((R)-1-((S)-4-hydroxy-6-((R)-2-methylbutyl)-2-oxo-6-phenethyl-5,6-dihydro-2H-pyran-3-yl)propyl)phenyl)-5-(trifluoromethyl)pyridine-2-sulfonamide     |
| 5262 | 19t |  | N-(5-((S)-2-fluoro-1-((S)-4-hydroxy-2-oxo-6-phenethyl-6-propyl-5,6-dihydro-2H-pyran-3-yl)ethyl)pyridin-3-yl)-5-(trifluoromethyl)pyridine-2-sulfonamide    |
| 5634 | 20t |  | N-(3-((R)-4-hydroxy-1-((R)-4-hydroxy-2-oxo-6-phenethyl-6-propyl-5,6-dihydro-2H-pyran-3-yl)butyl)phenyl)-5-(trifluoromethyl)pyridine-2-sulfonamide         |

|            |     |                                                                                                                                                                                                                                                                                                                                                                                                                                                                                           |                                                                                                                                                                                                                                                                                                                                                                                                                |
|------------|-----|-------------------------------------------------------------------------------------------------------------------------------------------------------------------------------------------------------------------------------------------------------------------------------------------------------------------------------------------------------------------------------------------------------------------------------------------------------------------------------------------|----------------------------------------------------------------------------------------------------------------------------------------------------------------------------------------------------------------------------------------------------------------------------------------------------------------------------------------------------------------------------------------------------------------|
| Tipranavir | 21t | 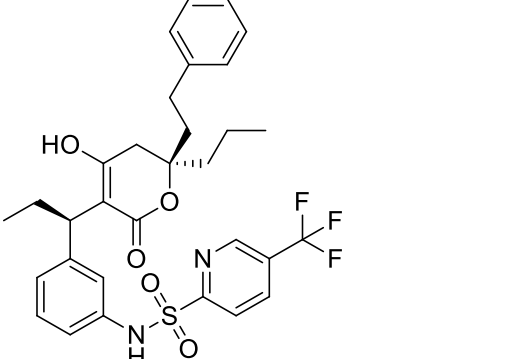 <p>The structure shows a central pyran ring with a hydroxyl group at the 4-position, a propyl group at the 6-position, and a phenethyl group at the 2-position. It is substituted with a (1R)-1-phenylethyl group at the 3-position and a (2R)-2-(trifluoromethyl)pyridine-5-ylpropyl group at the 5-position. A sulfonamide group is attached to the pyran ring.</p>                                   | <p><i>N</i>-[3-[(1<i>R</i>)-1-[(2<i>R</i>)-4-hydroxy-6-oxo-2-(2-phenylethyl)-2-propyl-3<i>H</i>-pyran-5-yl]propyl]phenyl]-5-(trifluoromethyl)pyridine-2-sulfonamide</p> <p>Obtained from pubchem</p> <p><i>N</i>-(3-((<i>R</i>)-1-((<i>R</i>)-4-hydroxy-2-oxo-6-phenethyl-6-propyl-5,6-dihydro-2<i>H</i>-pyran-3-yl)propyl)phenyl)-5-(trifluoromethyl)pyridine-2-sulfonamide</p> <p>Obtained with ChemDraw</p> |
| 1510       | 22t |  <p>The structure features a central pyran ring with a hydroxyl group at the 4-position, a propyl group at the 6-position, and a phenethyl group at the 2-position. It is substituted with a (1R)-1-phenylethyl group at the 3-position and a (2S)-2-(trifluoromethyl)pyridine-5-ylpropyl group at the 5-position. A sulfonamide group is attached to the pyran ring.</p>                                | <p><i>N</i>-(6-((<i>S</i>)-1-((<i>R</i>)-4-hydroxy-2-oxo-6-phenethyl-6-propyl-5,6-dihydro-2<i>H</i>-pyran-3-yl)propyl)pyridin-2-yl)-5-(trifluoromethyl)pyridine-2-sulfonamide</p>                                                                                                                                                                                                                              |
| 6675       | 23t |  <p>The structure features a central pyran ring with a hydroxyl group at the 4-position, a propyl group at the 6-position, and a phenethyl group at the 2-position. It is substituted with a (1R)-1-phenylethyl group at the 3-position and a (2S)-2-(2-fluoro-1-((R)-4-hydroxy-2-oxo-6-phenethyl-6-propyl-5,6-dihydro-2H-pyran-3-yl)ethyl)pyridin-2-yl)-5-(trifluoromethyl)pyridine-2-sulfonamide.</p> | <p><i>N</i>-(6-((<i>S</i>)-2-fluoro-1-((<i>R</i>)-4-hydroxy-2-oxo-6-phenethyl-6-propyl-5,6-dihydro-2<i>H</i>-pyran-3-yl)ethyl)pyridin-2-yl)-5-(trifluoromethyl)pyridine-2-sulfonamide</p>                                                                                                                                                                                                                      |
| 5719       | 24t |  <p>The structure features a central pyran ring with a hydroxyl group at the 4-position, a propyl group at the 6-position, and a phenethyl group at the 2-position. It is substituted with a (1R)-1-phenylethyl group at the 3-position and a (R)-4-(3-(5-(trifluoromethyl)pyridine-2-sulfonamido)phenyl)butanoic acid group at the 5-position.</p>                                                    | <p>(<i>R</i>)-4-((<i>R</i>)-4-hydroxy-2-oxo-6-phenethyl-6-propyl-5,6-dihydro-2<i>H</i>-pyran-3-yl)-4-(3-(5-(trifluoromethyl)pyridine-2-sulfonamido)phenyl)butanoic acid</p>                                                                                                                                                                                                                                    |
| 2541       | 25t |  <p>The structure features a central pyran ring with a hydroxyl group at the 4-position, a propyl group at the 6-position, and a phenethyl group at the 2-position. It is substituted with a (1R)-1-phenylethyl group at the 3-position and a (2S)-2-(3-(5-(trifluoromethyl)pyridine-2-sulfonamido)phenyl)propyl group at the 5-position.</p>                                                          | <p><i>N</i>-(3-((<i>R</i>)-1-((<i>S</i>)-4-hydroxy-2-oxo-6-phenethyl-6-(prop-2-yn-1-yl)-5,6-dihydro-2<i>H</i>-pyran-3-yl)propyl)phenyl)-5-(trifluoromethyl)pyridine-2-sulfonamide</p>                                                                                                                                                                                                                          |

|      |     |  |                                                                                                                                                         |
|------|-----|--|---------------------------------------------------------------------------------------------------------------------------------------------------------|
| 170  | 26t |  | N-(3-((R)-1-((S)-4-hydroxy-6-isobutyl-2-oxo-6-phenethyl-5,6-dihydro-2H-pyran-3-yl)propyl)phenyl)-5-(trifluoromethyl)pyridine-2-sulfonamide              |
| 1186 | 27t |  | N-(3-((R)-1-((R)-6-(4-fluorophenethyl)-4-hydroxy-2-oxo-6-propyl-5,6-dihydro-2H-pyran-3-yl)propyl)phenyl)-5-(trifluoromethyl)pyridine-2-sulfonamide      |
| 1493 | 28t |  | N-(3-((R)-3-cyano-1-((R)-4-hydroxy-2-oxo-6-phenethyl-6-propyl-5,6-dihydro-2H-pyran-3-yl)propyl)phenyl)-5-(trifluoromethyl)pyridine-2-sulfonamide        |
| 4435 | 29t |  | N-(5-((R)-1-((R)-6-(2-fluoroethyl)-4-hydroxy-2-oxo-6-phenethyl-5,6-dihydro-2H-pyran-3-yl)propyl)pyridin-3-yl)-5-(trifluoromethyl)pyridine-2-sulfonamide |
| 264  | 30t |  | N-(3-((R)-3-hydroxy-1-((R)-4-hydroxy-2-oxo-6-phenethyl-6-propyl-5,6-dihydro-2H-pyran-3-yl)propyl)phenyl)-5-(trifluoromethyl)pyridine-2-sulfonamide      |

Table S9: Name and structures of selected designed derivatives of efavirenz as potential inhibitors of zika virus RNA-dependent RNA polymerase (RdRP) or methyltransferase (MTase)

| Code      | ID | Smiles                                                                              | Name                                                                                                   |
|-----------|----|-------------------------------------------------------------------------------------|--------------------------------------------------------------------------------------------------------|
| 1501      | 1e | 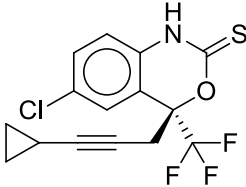   | (S)-6-chloro-4-(3-cyclopropylprop-2-yn-1-yl)-4-(trifluoromethyl)-1H-benzo[d][1,3]oxazine-2(4H)-thione  |
| 1436      | 2e |    | (S)-6-chloro-4-(3-cyclopropylprop-2-yn-1-yl)-4-(trifluoromethyl)-1H-pyrido[3,4-d][1,3]oxazin-2(4H)-one |
| Efavirenz | 3e |    | (S)-6-chloro-4-(cyclopropylethynyl)-4-(trifluoromethyl)-1H-benzo[d][1,3]oxazin-2(4H)-one               |
| 4403      | 4e |   | (S)-5-(cyclopropylethynyl)-3-fluoro-5-(trifluoromethyl)-5H-pyridazino[3,4-d][1,3]oxazine-7(8H)-thione  |
| 4327      | 5e |  | (S)-3-chloro-5-(cyclopropylethynyl)-5-(trifluoromethyl)-5H-pyridazino[3,4-d][1,3]oxazine-7(8H)-thione  |

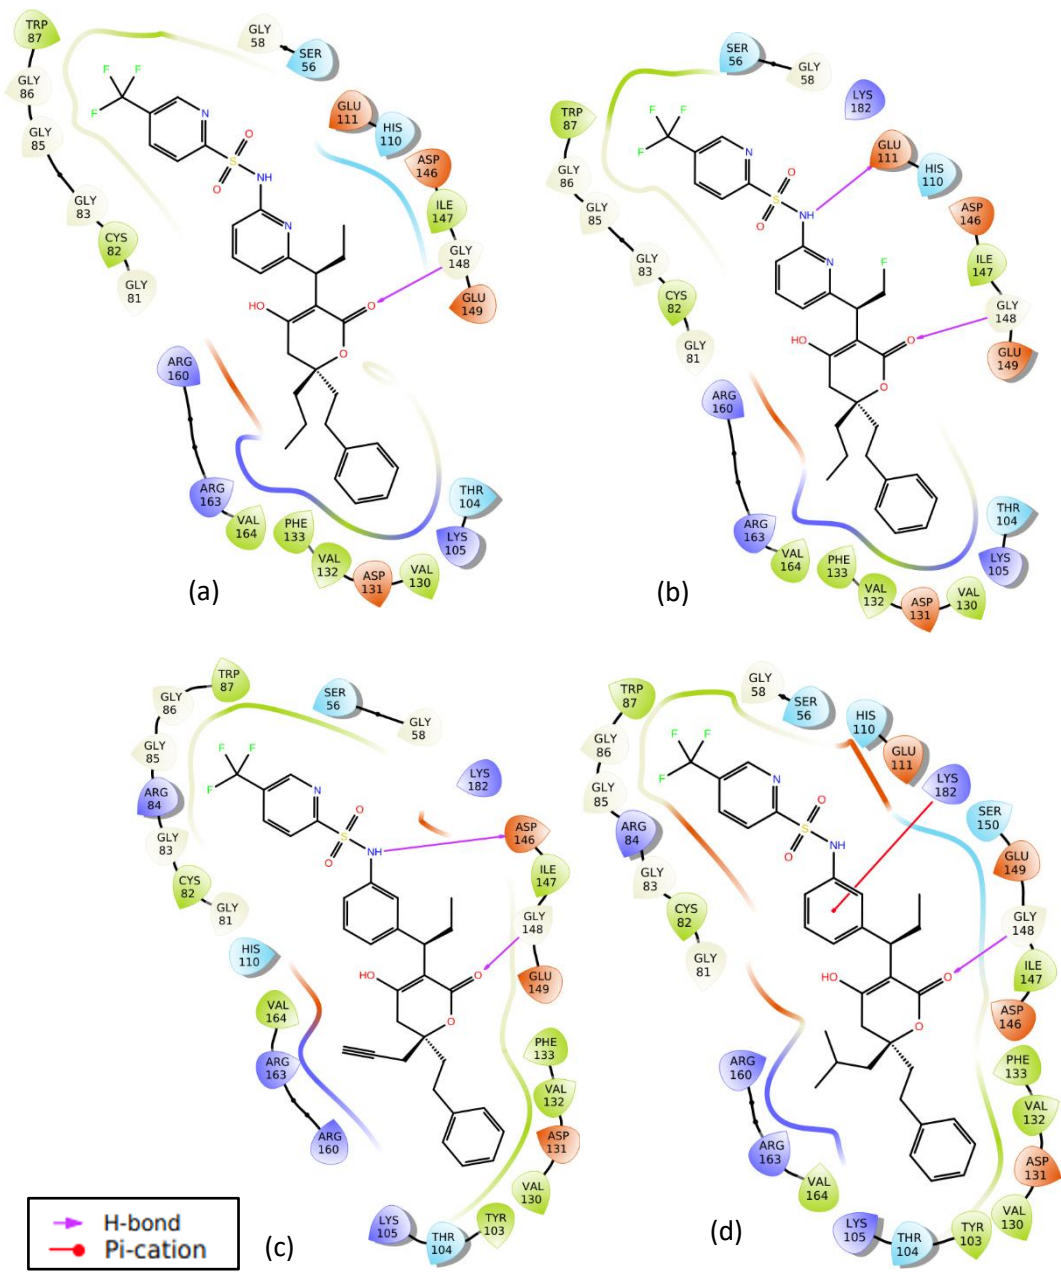

Figure S2: Molecular interactions of **22t** (a), **23t** (b), **25t** (c) and **26t** (d) with zika virus NS5-methyltransferase.



**Table S10: Drug-likeness and pharmacokinetic parameters of derivatives of dasabuvir with high GI absorption**

| ID         | MW     | #Rotatable bonds | #H-bond acceptors | #H-bond donors | TPSA   | Consensus Log P | GIA  | Pgp substrate | CYP1A2 inhibitor | CYP2C19 inhibitor | CYP2C9 inhibitor | CYP2D6 inhibitor | CYP3A4 inhibitor | Lipinski #violations | Bioavailability Score | PAINS #alerts | Synthetic Accessibility |
|------------|--------|------------------|-------------------|----------------|--------|-----------------|------|---------------|------------------|-------------------|------------------|------------------|------------------|----------------------|-----------------------|---------------|-------------------------|
| <b>23d</b> | 507.6  | 7                | 6                 | 2              | 118.64 | 3.72            | High | No            | No               | Yes               | Yes              | No               | Yes              | 1                    | 0.55                  | 0             | 3.59                    |
| <b>24d</b> | 492.59 | 6                | 5                 | 1              | 106.61 | 4.25            | High | No            | No               | Yes               | Yes              | No               | Yes              | 0                    | 0.55                  | 0             | 3.57                    |
| <b>6d</b>  | 429.51 | 5                | 4                 | 2              | 90.11  | 3.94            | High | Yes           | No               | No                | Yes              | No               | Yes              | 0                    | 0.55                  | 0             | 3.26                    |
| <b>15d</b> | 493.57 | 6                | 5                 | 2              | 118.64 | 3.8             | Low  | No            | No               | Yes               | Yes              | No               | Yes              | 0                    | 0.55                  | 0             | 3.46                    |

Derivatives of dasabuvir (**23d**, **24d** and **6d**) that showed high GI absorption, better binding energies and Ki compared with dasabuvir. This dasabuvir derivatives show NO to BBB just like the parent compound. The derivatives of efavirenz (**1e**, **2e**, **4e** and **5e**) showed high GI absorption like the parent compound (efavirenz) with only 1e, 2e showing YES for BBB.

**Table S11: Predicted toxicity of designed derivatives of dasabuvir with high GI absorption**

| ID         | Formula                                                         | AMES toxicity | Max. tolerated dose (human) (Log mg/kg/day) | hERG I inhibitor | hERG II inhibitor | Oral rat acute Toxicity (LD <sub>50</sub> ) (mol/kg) | Oral rat chronic toxicity (LOAEL) (Log mg/kg_bw/day) | Hepato toxicity | Skin Sensitization |
|------------|-----------------------------------------------------------------|---------------|---------------------------------------------|------------------|-------------------|------------------------------------------------------|------------------------------------------------------|-----------------|--------------------|
| <b>23d</b> | C <sub>27</sub> H <sub>29</sub> N <sub>3</sub> O <sub>5</sub> S | Yes           | 0.233                                       | No               | Yes               | 2.932                                                | 1.502                                                | Yes             | No                 |
| <b>24d</b> | C <sub>27</sub> H <sub>28</sub> N <sub>2</sub> O <sub>5</sub> S | Yes           | 0.126                                       | No               | Yes               | 3.011                                                | 0.796                                                | Yes             | No                 |
| <b>6d</b>  | C <sub>26</sub> H <sub>27</sub> N <sub>3</sub> O <sub>3</sub>   | Yes           | 0.375                                       | No               | Yes               | 2.566                                                | 1.658                                                | Yes             | No                 |
| <b>15d</b> | C <sub>26</sub> H <sub>27</sub> N <sub>3</sub> O <sub>5</sub> S | No            | 0.149                                       | No               | Yes               | 3.081                                                | 3.139                                                | Yes             | No                 |

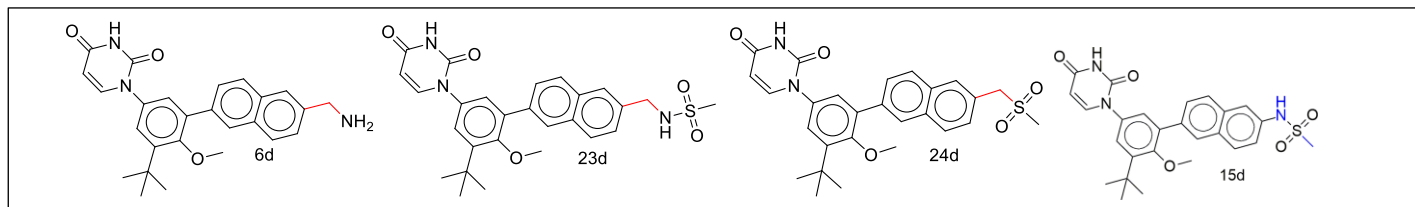

Figure S3: Structural determinant of high Gastrointestinal absorption (GIA) for derivatives of dasabuvir. Compounds **6d**, **23d** and **24d** are compounds with high GIA compared with dasabuvir (**15d**) with low GIA.

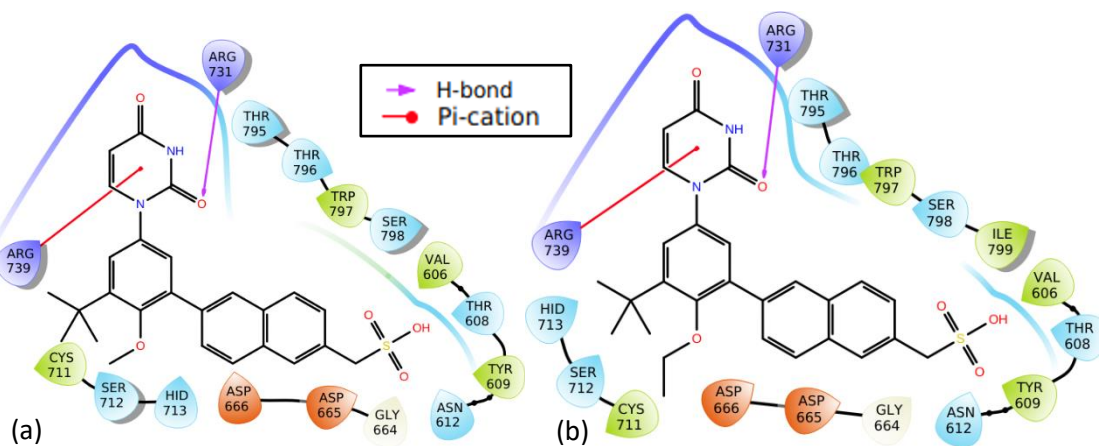

Figure S4: Molecular interactions of designed derivatives of dasabuvir (**20d** and **21d**) with zika virus RNA-dependent RNA polymerase. Interactions of **20d** (a) and **21d** (b) with RNA-dependent RNA polymerase

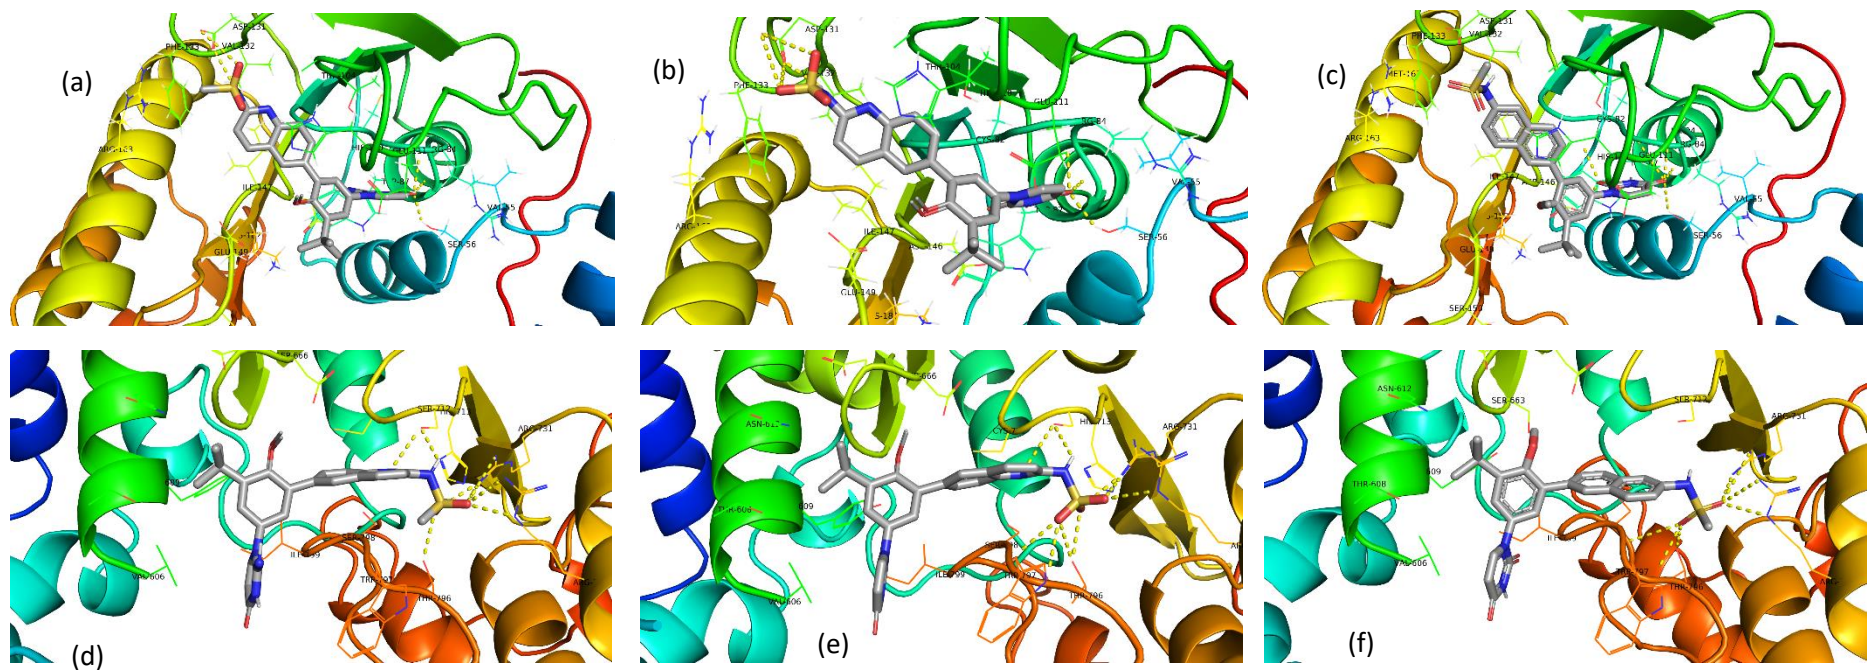

Figure S5: Three-dimensional molecular interactions of two representatives of derivatives of dasabuvir and dasabuvir, **15d** with zika virus methyltransferase and RNA-dependent RNA polymerase. First panel (a-c) is the interactions of **3d**, **5d** and dasabuvir respectively with methyltransferase while the second panel (d-f) is that of interactions with RNA-dependent RNA polymerase respectively.



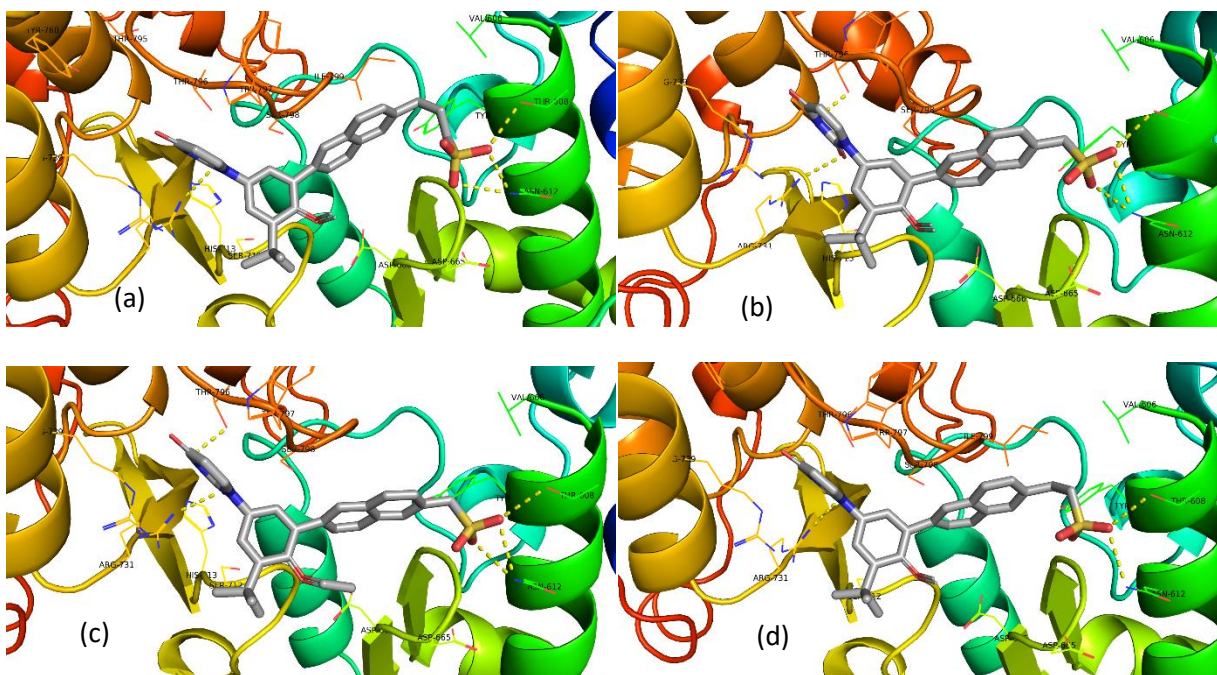

Figure S6: Three-dimensional molecular interactions of **19d**, **20d**, **21d**, **22d** with zika virus RNA-dependent RNA polymerase. First panel (a-b) is the interactions of **19d**, **20d** while the second panel (c-d) is that of interactions 21d and 22d with the RNA-dependent RNA polymerase respectively.

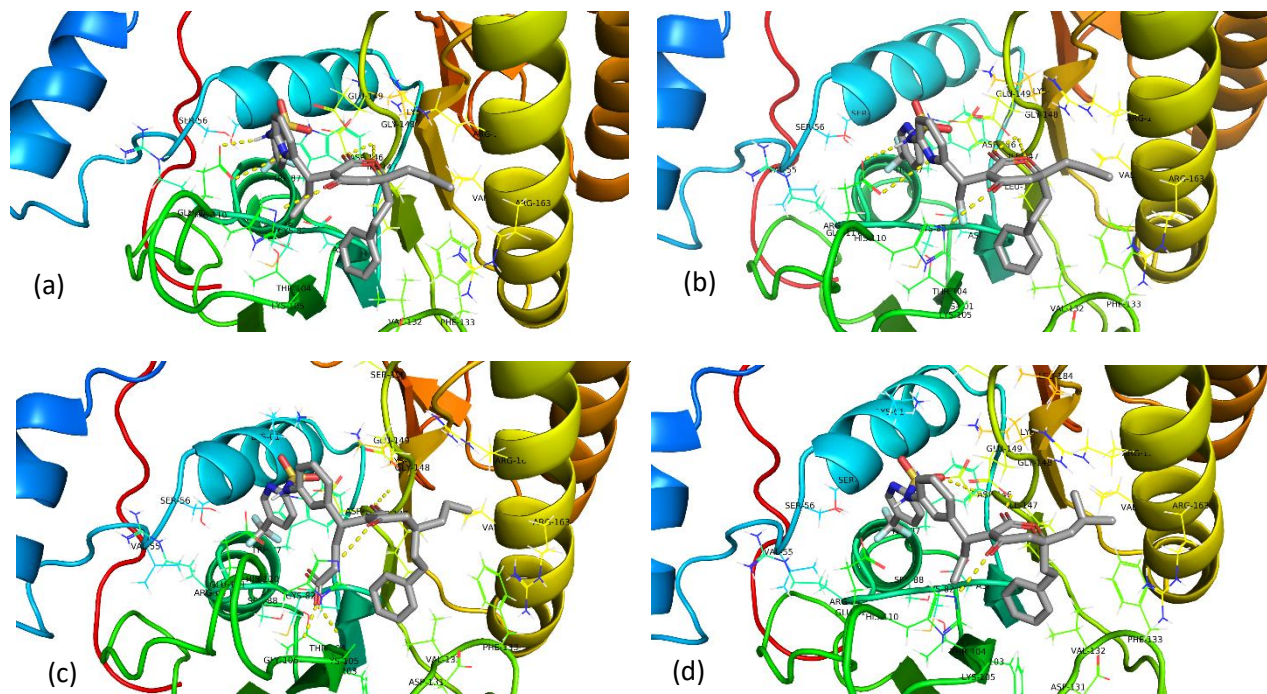

Figure S7: Three-dimensional molecular interactions of **22t**, **23t**, **24t**, **26t** with zika virus methyltransferase. First panel (a-b) is the interactions of **22t**, **23t** while the second panel (c-d) is that of interactions **24t** and **26t** with the methyltransferase respectively.

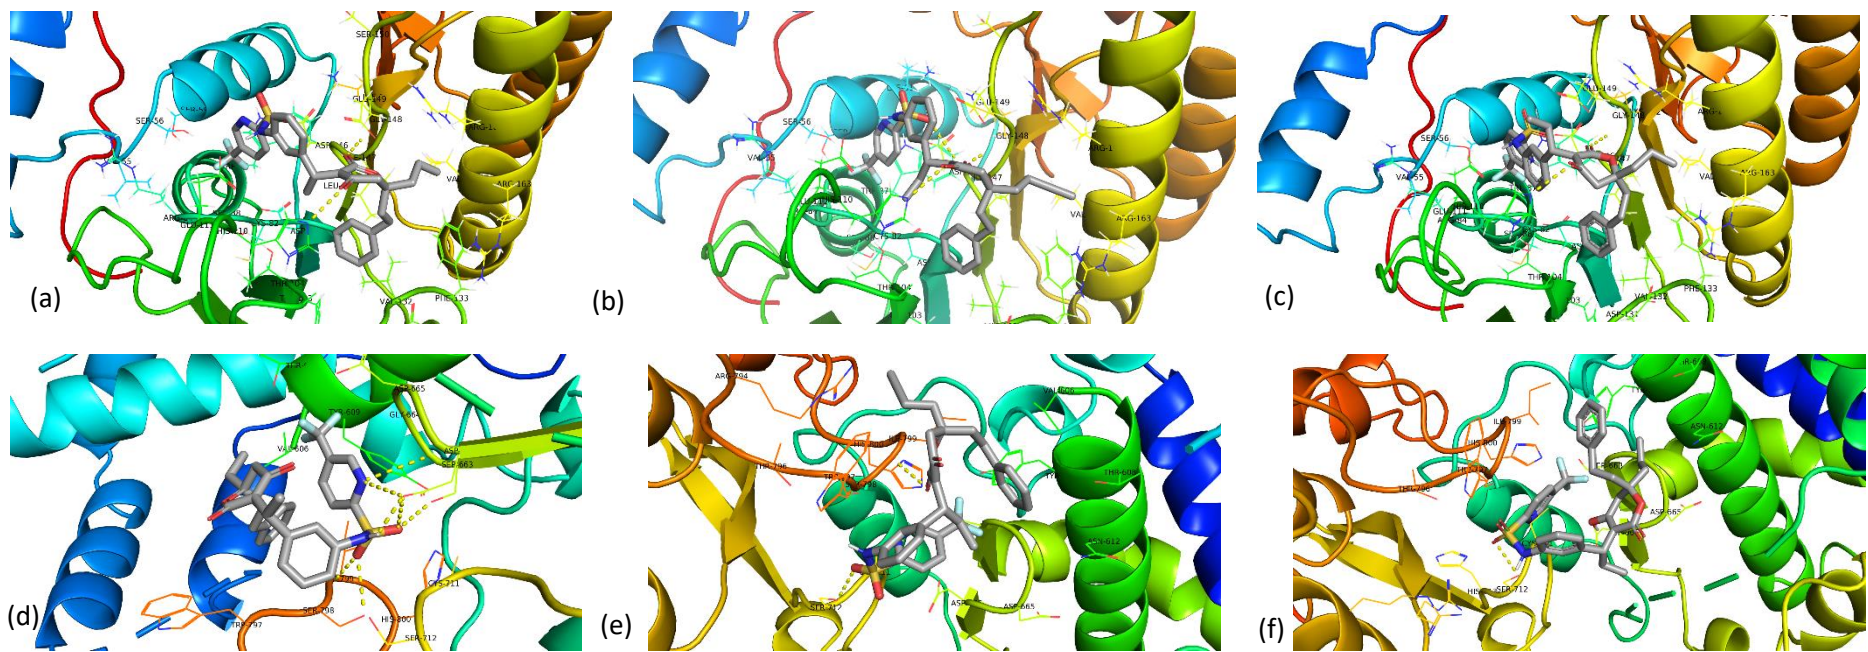

Figure S8: Three-dimensional Molecular interactions of two representatives of derivatives of tipranavir (**3t** and **10t**) and tipranavir, **21t** with zika virus methyltransferase and RNA-dependent RNA polymerase. First panel (a-c) is the interactions of **3t**, **10t** and tipranavir respectively with methyltransferase while the second panel (d-f) is that of interactions with RNA-dependent RNA polymerase respectively
